# Supplementary material for: Dynamics of hydrological and geomorphological processes in evaporite karst at the eastern Dead Sea – a multidisciplinary study
Source: Copernicus journal article supplement (doi:10.5194/hess-25-3351-2021), 2021-06-16
Supplement: Supplementary file 1 [file hess-25-3351-2021-supplement.zip]

Archive with 4 entries (4 files):
- hess-25-3351-2021-supplement-title-page.pdf
- spring_s4_1.mp4
- Spring_s4_2.mp4
- Spring_s4_3.mp4
