# Supplementary material for: Dynamics of hydrological and geomorphological processes in evaporite karst at the eastern Dead Sea – a multidisciplinary study
Source: Copernicus journal article supplement (doi:10.5194/hess-25-3351-2021), 2021-06-16
Supplement: Supplementary file 1 [file hess-25-3351-2021-supplement.zip › hess-25-3351-2021-supplement-title-page.pdf]

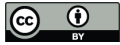

*Supplement of*

**Dynamics of hydrological and geomorphological processes in  
evaporite karst at the eastern Dead Sea – a multidisciplinary study**

**Djamil Al-Halbouni et al.**

*Correspondence to:* Djamil Al-Halbouni (dhalbouni@geomar.de)

- hess-25-3351-2021-supplement-title-page.pdf
- Spring\_s4\_2.mp4
- Spring\_s4\_3.mp4
- spring\_s4\_1.mp4

The copyright of individual parts of the supplement might differ from the article licence.
